# Supplementary material for: Access to cancer medicines deemed essential by oncologists in 82 countries: an international, cross-sectional survey
Source: PubMed Central journal article supplement (PMC8476341; doi:10.1016/s1470-2045(21)00463-0), 2021-10
Supplement: mmc1.pdf [file mmc1.pdf]

# THE LANCET Oncology

## Supplementary appendix

This appendix formed part of the original submission and has been peer reviewed.  
We post it as supplied by the authors.

Supplement to: Fundytus A, Sengar M, Lombe D, et al. Access to cancer medicines deemed essential by oncologists in 82 countries: an international, cross-sectional survey. *Lancet Oncol* 2021; published online Sept 21. [http://dx.doi.org/10.1016/S1470-2045\(21\)00463-0](http://dx.doi.org/10.1016/S1470-2045(21)00463-0).

## Supplementary Appendix 1

### Survey Questionnaire and Possible Responses to WHO EML Survey

Thank you for agreeing to participate in this WHO project. The objectives of this study are to understand which cancer medicines front-line clinicians consider essential to cancer care, and the extent to which these medicines are available in routine practice.

#### Survey Questionnaire

1a. Which country do you currently practice in?

A 218-country dropdown list derived from the world bank was available for selection.

1b. Other Country (Free Text)

2. Are you a:

- Medical Oncologist that prescribes systemic anti-cancer therapy
- Radiation Oncologist that prescribes systemic anti-cancer therapy
- Clinical Oncologist that prescribes systemic anti-cancer therapy
- Other Physician that prescribes systemic anti-cancer therapy
- I do not prescribe systemic anti-cancer therapy

3. Are you currently an oncology trainee (Medical Student, Resident or Fellow)?

- Yes
- No

4. Do you provide:

- Systemic anti-cancer therapy
- Radiation therapy only
- Both systemic anti-cancer therapy and radiation therapy
- Neither systemic anti-cancer therapy nor radiation therapy

5. Do you administer cancer treatment to children?

- No
- Yes but I treat adults as well
- Yes I treat exclusively children

6. A dedicated survey for pediatric oncologists is being distributed through the International Society of Pediatric Oncology (SIOP).

If you are not a SIOP member and still wish to participate, please contact Christopher Booth:  
christopher.booth@kingstonhsc.ca

7. Imagine your government has put you in charge of selecting anti-cancer medicines for the country. You are only allowed to select a maximum of 10 medicines that will be available to treat all cancers in your country. Which drugs would you recommend to the government to achieve the greatest benefit for the most patients? Assume that cost (system and patient) is not an issue and that you have access to the necessary supportive care medicines, diagnostic, and laboratory services).

- Abemaciclib
- Abiraterone
- Acalabrutinib
- Afatinib
- Aldesleukin
- Alectinib
- Alemtuzumab
- Amsacrine
- Anagrelide
- Anastrozole
- Apalutamide
- Arsenic Trioxide
- Atezolizumab
- Avelumab
- Axitinib
- Azacitidine
- Bendamustine
- Bevacizumab
- Bicalutamide
- Bleomycin
- Blinatumomab
- Bortezomib
- Bosutinib
- Brentuximab Vedotin
- Brigatinib
- Buserelin
- Busulfan
- Cabazitaxel
- Cabozantinib
- Capecitabine
- Carboplatin
- Carfilzomib

- Carmustine
- Ceritinib
- Cetuximab
- Chlorambucil
- Cisplatin
- Cladribine
- Cobimetinib
- Crizotinib
- Cyclophosphamide
- Cytarabine
- Dabrafenib
- Dacarbazine
- Dactinomycin
- Daratumumab
- Dasatinib
- Danorubicin
- Decitabine
- Degarelix
- Denosumab
- Dexamethasone
- Dinutuximab
- Docetaxel
- Doxorubicin
- Durvalumab
- Elotuzumab
- Enzalutamide
- Epirubicin
- Eribulin
- Erlotinib
- Erwinia Asparaginase
- Etoposide
- Everolimus
- Exemestane
- Fludarabine
- 5-Fluorouracil
- Flutamide
- Fulvestrant
- Gefitinib
- Gemcitabine
- Goserelin
- Hydroxyurea
- Ibrutinib
- Idarubicin
- Idelalisib

- Ifosfamide
- Imatinib
- Inotuzumab ozogamicin
- Interferon alfa-2b
- Ipilimumab
- Irinotecan
- Ixazomib
- Trastuzumab Emtansine (TDM-1)
- L-Asparaginase
- Lanreotide
- Lapatinib
- Lenalidomide
- Lenvatinib
- Letrozole
- Leucovorin
- Leuprolide
- Liposomal Irinotecan
- Lomustine
- Lorlatinib
- Medroxyprogesterone
- Megestrol Acetate
- Melphalan
- Mercaptopurine
- Methotrexate
- Midostaurin
- Mitomycin
- Mitotane
- Mitoxantrone
- Nab-Paclitaxel
- Nelarabine
- Nilotinib
- Nilutamide
- Nivolumab
- Obinutuzumab
- Octreotide
- Olaparib
- Osimertinib
- Oxaliplatin
- Paclitaxel
- Palbociclib
- Pamidronate
- Panitumumab
- Pazopanib
- Pegaspargase

- Pegylated liposomal Doxorubicin
- Pembrolizumab
- Pemetrexed
- Pertuzumab
- Pomalidomide
- Ponatinib
- Pralatrexate
- Prednisone
- Procarbazine
- Radium-223
- Raltitrexed
- Ramucirumab
- Regorafenib
- Ribociclib
- Rituximab
- Romidepsin
- Ruxolitinib
- Siltuximab
- Sorafenib
- Strontium-89
- Sunitinib
- Tamoxifen
- Talazoparib
- Temozolomide
- Temsirolimus
- Thalidomide
- Thioguanine
- Topotecan
- Trabectedin
- Trametinib
- Trastuzumab
- Tretinoin (ATRA)
- Trifluridine / Tipiracil
- Triptorelin
- Vandetanib
- Veleparib
- Vemurafinib
- Venetoclax
- Vinblastine
- Vincristine
- Vinorelbine
- Vismodegib
- Vorinostat
- Zoledronic acid

Other \_\_\_\_\_

8. What is the current access to each of Drug 1-10 selected by participant in question 7 (was auto populated using Qualtrics code) in your practice setting?

- Available for all patients with no significant out of pocket expenses for more than 90% of patients (i.e. universal healthcare coverage)
- Available for all patients with significant out of pocket expenses for some patients, based on the health insurance schemes (mixed model, not universal healthcare coverage)
- Available for all the patients with significant out of pocket expenses for more than half of the patients (not universal healthcare coverage, substantial risk of catastrophic health expenditure\*) \* spending that absorbs more than 40% of total consumption, net of an allowance for food expenditures
- Not readily available due to problems with drug supply/procurement/production
- Not available as drug is not approved in my country
- Not available for other reasons (Free text provided if selected)

9. Below is the list of medicines you previously selected for your country assuming cost was NOT an issue. If your government now tells you that drug cost IS an issue - would you remove any of these drugs from the list? (Participants 10 selected drugs are displayed with checkbox)

10. Below is a list of cancer medicines (not including supportive care) currently listed on the WHO EML. [c] denotes drugs present on the children's EML.

11. Are there important cancer medications which are not currently listed that should be considered for addition to the WHO EML?

- Yes
- No

12. Please list the important cancer medications that are not currently listed that should be considered. (Free Text Box Available)

## WHO EML

### **Cytotoxic Medicines**

Arsenic Trioxide [c]  
Asparaginase [c]  
Bendamustine  
Bleomycin [c]  
Calcium Folate [c]  
Capecitabine  
Carboplatin [c]  
Chlorambucil  
Cisplatin [c]  
Cyclophosphamide [c]  
Cytarabine [c]  
Dacarbazine [c]  
Dactinomycin [c]  
Daunorubicin [c]  
Docetaxel  
Doxorubicin [c]  
Etoposide [c]  
Fludarabine  
Fluorouracil [c]  
Gemcitabine  
Hydroxycarbamide [c]  
Ifosfamide [c]  
Irinotecan [c]  
Melphalan  
Mercaptopurine [c]  
Methotrexate [c]  
Oxaliplatin [c]  
Paclitaxel [c]  
Pegaspargase [c]

Procarbazine [c]  
Realgar-Indigo naturalis formulation [c]  
Tioguanine [c]  
Vinblastine [c]  
Vincristine [c]  
Vinorelbine

### **Targeted Therapies**

All-trans retinoid acid (ATRA) [c]  
Bortezomib  
Dastinib [c]  
Erlotinib  
Imatinib [c]  
Nilotinib [c]  
Rituximab [c]  
Trastuzumab

### **Immunomodulators**

Filgrastim [c]  
Lenalidomide  
Nivolumab  
Thalidomide

### **Hormones and Antihormones**

Abiraterone  
Anastrozole  
Bicalutamide  
Dexamethasone [c]  
Hydrocortisone [c]

Leuporelin  
Methylprednisolone [c]  
Prednisolone [c]  
Tamoxifen

### **Supportive Medicines**

Allopurinol [c]  
Mesna [c]  
Zoledronic Acid

13. Is there a national EML list (that includes cancer medicines) in your country?

- Yes
- No
- I don't know

14. Is the national EML list shaped on the WHO list?

- Yes
- No
- I don't know

15. The use of a national EML improves the access of patients to cancer treatments?

- Strongly Disagree
- Disagree
- Neutral
- Agree



- Strongly Agree

16. The current WHO EML improves the access of patients to cancer treatments?

- Strongly Disagree
- Disagree
- Neutral
- Agree
- Strongly Agree

17. Do you play a role in any of the following drug guideline related activities? (Check all that Apply)

- Formulary (hospital, regional, or national)
- Health Technology Assessment
- Guideline Writing
- Regulatory or Funding Decision Making

18. Do you work in the:

- Public health care system
- Private health care system
- Both

19. Is your primary practice located in an urban or rural center? Note: rural is defined as a population of less than fifty thousand and not within a two hour reasonable commuting distance of a large center

- Urban
- Rural
- I work in both

20. Which types of cancer do you treat?

- Solid Tumors
- Hematological Malignancy
- Both

21. Which cancers do you treat? (Check all that apply)

- Brain
- Breast
- Gastrointestinal
- Genitourinary
- Gynecological
- Head and Neck
- Lung
- Sarcoma
- Skin/Cutaneous
- Hematologic
- Other

22. Do you currently work in an academic center?

- Yes
- No

23. What describes your current practice best?

- Hospital-based clinic
- Clinic not affiliated with hospital
- Both

24. Please state the number of years of practice in oncology since you completed your training (Free text box)

25. Gender

- Male
- Female
- Other

26. Age (Free text Box)

27. Is there anything else you would like to share regarding the WHO EML? (Free Text Box)

28a. If you would be willing to be contacted for follow-up of the study, please provide your name and email address:

- Yes
- No

28b. Name (Free Text Box)

28c. Email (Free Text Box)

## Appendix 2- Distribution Networks and Response Rates

| Country/Region       | Contact Type          | # of responses | Denominator | Response Rate |
|----------------------|-----------------------|----------------|-------------|---------------|
| <b>North America</b> |                       |                |             |               |
| Canada               | National organization | 43             | 213         | 20%           |
| United States        | National organization | 100            | Unknown     | Unknown       |
| Caribbean            | Personal network      | 9              | Unknown     | Unknown       |
| <b>South America</b> |                       |                |             |               |
| Latin America        | Regional network      | 22             | Unknown     | Unknown       |
| Argentina            | National organization | 27             | 170         | 16%           |
| Brazil               | National organization | 39             | 2073        | 2%            |
| Chile                | National organization | 7              | Unknown     | Unknown       |
| Venezuela            | Personal network      | 3              | 5           | 60%           |
| <b>Europe</b>        |                       |                |             |               |
| Andorra              | Personal network      | 1              | 2           | 50%           |
| Belgium              | Personal network      | 10             | Unknown     | Unknown       |
| Denmark              | National organization | 1              | Unknown     | Unknown       |
| Estonia              | National organization | 7              | 35          | 20%           |
| Finland              | National organization | 8              | 300         | 3%            |
| France               | Personal network      | 29             | 243         | 12%           |
| Greece               | National organization | 25             | 378         | 7%            |
| Hungary              | National organization | 43             | Unknown     | Unknown       |
| Luxembourg           | National organization | 1              | 20          | 5%            |
| Netherlands          | Personal network      | 1              | Unknown     | Unknown       |
| Portugal             | National organization | 24             | 811         | 3%            |
| Romania              | National organization | 7              | 300         | 2%            |
| Russia               | National organization | 1              | 1350        | 0%            |
| Serbia               | Personal network      | 1              | 100         | 1%            |
| Slovenia             | National organization | 13             | 46          | 28%           |
| Spain                | National organization | 41             | Unknown     | Unknown       |
| Switzerland          | Personal network      | 27             | Unknown     | Unknown       |
| Turkey               | Personal network      | 30             | Unknown     | Unknown       |
| UK                   | National organization | 14             | 1000        | 1%            |
| <b>Asia</b>          |                       |                |             |               |
| Bangladesh           | Personal network      | 2              | 123         | 2%            |

|                           |                       |     |         |         |
|---------------------------|-----------------------|-----|---------|---------|
| India                     | Personal network      | 84  | Unknown | Unknown |
| Japan                     | National organization | 141 | 6842    | 2%      |
| Korea                     | National organization | 13  | 500     | 3%      |
| Malaysia                  | National organization | 9   | 120     | 8%      |
| Nepal                     | National organization | 9   | Unknown | Unknown |
| Pakistan                  | Personal network      | 21  | 60      | 35%     |
| Singapore                 | National organization | 9   | 130     | 7%      |
| Sri Lanka                 | National organization | 6   | Unknown | Unknown |
| Taiwan                    | National organization | 20  | Unknown | Unknown |
| <b>Middle East</b>        |                       |     |         |         |
| Iraq                      | National organization | 2   | Unknown | Unknown |
| Israel                    | Personal network      | 2   | Unknown | Unknown |
| Jordan                    | National organization | 7   | Unknown | Unknown |
| Kuwait                    | Personal network      | 7   | Unknown | Unknown |
| Lebanon                   | National organization | 12  | 179     | 7%      |
| UAE                       | National organization | 4   | 95      | 4%      |
| <b>Sub Saharan Africa</b> |                       |     |         |         |
| Sub Saharan Africa        | Regional Network      | 32  | Unknown | Unknown |
| <b>Oceania</b>            |                       |     |         |         |
| Australia                 | National organization | 38  | Unknown | Unknown |
| New Zealand               | Personal network      | 3   | Unknown | Unknown |

**Note:** 89 countries and regional networks (SLACOM, Sub-Saharan Africa) were invited to participate in this study. This table shows responses from the 46 countries/regional networks who accepted the invitation and distributed the survey. From these 46 networks, the study had 948 respondents from 82 different countries.

**Appendix 3-Complete List of “Essential” Drugs Ranked by Frequency of Selection by 948 Oncologists in Global Essential Medicines Survey**

| Rank      | Drug                                | Frequency of Selection | % of Oncologists who Chose Drug on List of Top 10 Most Essential |
|-----------|-------------------------------------|------------------------|------------------------------------------------------------------|
| <b>1</b>  | <b><i>Doxorubicin</i></b>           | <b>499</b>             | <b>53</b>                                                        |
| <b>2</b>  | <b><i>Cisplatin</i></b>             | <b>470</b>             | <b>50</b>                                                        |
| <b>3</b>  | <b><i>Paclitaxel</i></b>            | <b>423</b>             | <b>45</b>                                                        |
| <b>4</b>  | <b><i>Pembrolizumab</i></b>         | <b>413</b>             | <b>44</b>                                                        |
| <b>5</b>  | <b><i>Trastuzumab</i></b>           | <b>399</b>             | <b>42</b>                                                        |
| <b>6</b>  | <b><i>Carboplatin</i></b>           | <b>390</b>             | <b>41</b>                                                        |
| <b>7</b>  | <b><i>5-Fluorouracil</i></b>        | <b>386</b>             | <b>41</b>                                                        |
| <b>8</b>  | <b><i>Tamoxifen</i></b>             | <b>345</b>             | <b>36</b>                                                        |
| <b>9</b>  | <b><i>Capecitabine</i></b>          | <b>329</b>             | <b>35</b>                                                        |
| <b>10</b> | <b><i>Cyclophosphamide</i></b>      | <b>318</b>             | <b>34</b>                                                        |
| <b>11</b> | <b><i>Docetaxel</i></b>             | <b>296</b>             | <b>31</b>                                                        |
| <b>12</b> | <b><i>Oxaliplatin</i></b>           | <b>269</b>             | <b>28</b>                                                        |
| <b>13</b> | <b><i>Dexamethasone</i></b>         | <b>248</b>             | <b>26</b>                                                        |
| <b>14</b> | <b><i>Nivolumab</i></b>             | <b>204</b>             | <b>22</b>                                                        |
| <b>15</b> | <b><i>Rituximab</i></b>             | <b>203</b>             | <b>21</b>                                                        |
| <b>16</b> | <b><i>Imatinib</i></b>              | <b>184</b>             | <b>19</b>                                                        |
| <b>17</b> | <b><i>Gemcitabine</i></b>           | <b>180</b>             | <b>19</b>                                                        |
| <b>18</b> | <b><i>Etoposide</i></b>             | <b>170</b>             | <b>18</b>                                                        |
| 19        | Osimertinib                         | 157                    | 17                                                               |
| <b>20</b> | <b><i>Letrozole</i></b>             | <b>143</b>             | <b>15</b>                                                        |
| 21        | Bevacizumab                         | 120                    | 13                                                               |
| <b>22</b> | <b><i>Abiraterone</i></b>           | <b>118</b>             | <b>12</b>                                                        |
| <b>23</b> | <b><i>Goserelin</i><sup>^</sup></b> | <b>110</b>             | <b>12</b>                                                        |
| <b>24</b> | <b><i>Anastrozole</i></b>           | <b>100</b>             | <b>11</b>                                                        |
| <b>25</b> | <b><i>Irinotecan</i></b>            | <b>99</b>              | <b>10</b>                                                        |
| <b>26</b> | <b><i>Methotrexate</i></b>          | <b>95</b>              | <b>10</b>                                                        |
| <b>27</b> | <b><i>Vincristine</i></b>           | <b>86</b>              | <b>9</b>                                                         |
| 28        | Palbociclib                         | 75                     | 8                                                                |
| <b>29</b> | <b><i>Cytarabine</i></b>            | <b>73</b>              | <b>8</b>                                                         |
| 30        | Epirubicin                          | 71                     | 8                                                                |
| <b>31</b> | <b><i>Prednisone</i></b>            | <b>68</b>              | <b>7</b>                                                         |

|           |                                  |           |          |
|-----------|----------------------------------|-----------|----------|
| <b>32</b> | <b>Zoledronic acid</b>           | <b>67</b> | <b>7</b> |
| 33        | Pemetrexed                       | 63        | 7        |
| 34        | Alectinib                        | 61        | 6        |
| 35        | Atezolizumab                     | 59        | 6        |
| <b>36</b> | <b>Bortezomib</b>                | <b>59</b> | <b>6</b> |
| 37        | Cetuximab                        | 58        | 6        |
| <b>38</b> | <b>Leuprolide</b>                | <b>57</b> | <b>6</b> |
| <b>39</b> | <b>Bleomycin</b>                 | <b>56</b> | <b>6</b> |
| 40        | Nab-Paclitaxel                   | 56        | 6        |
| 41        | Temozolomide                     | 51        | 5        |
| 42        | Pertuzumab                       | 50        | 5        |
| 43        | Sunitinib                        | 49        | 5        |
| <b>44</b> | <b>Gefitinib</b>                 | <b>48</b> | <b>5</b> |
| 45        | Ipilimumab                       | 47        | 5        |
| 46        | Denosumab                        | 46        | 5        |
| 47        | Olaparib                         | 46        | 5        |
| 48        | Enzalutamide                     | 45        | 5        |
| 49        | Trastuzumab Emtansine<br>(TDM-1) | 45        | 5        |
| <b>50</b> | <b>Lenalidomide</b>              | <b>44</b> | <b>5</b> |
| 51        | Leucovorin                       | 42        | 4        |
| 52        | Fulvestrant                      | 37        | 4        |
| 53        | Ribociclib                       | 35        | 4        |
| 54        | Ibrutinib                        | 34        | 4        |
| <b>55</b> | <b>Erlotinib</b>                 | <b>32</b> | <b>3</b> |
| 56        | Dasatanib                        | 31        | 3        |
| 57        | Afatinib                         | 28        | 3        |
| 58        | Cabozantinib                     | 26        | 3        |
| 59        | Lenvatinib                       | 25        | 3        |
| 60        | Durvalumab                       | 24        | 3        |
| 61        | Lorlatinib                       | 24        | 3        |
| 62        | Sorafenib                        | 23        | 2        |
| 63        | Brentuximab Vedotin              | 22        | 2        |
| 64        | Danorubicin                      | 22        | 2        |
| 65        | Panitumumab                      | 22        | 2        |
| 66        | Daratumumab                      | 21        | 2        |
| 67        | Hydroxyurea                      | 21        | 2        |
| <b>68</b> | <b>Ifosfamide</b>                | <b>21</b> | <b>2</b> |

|            |                                 |           |          |
|------------|---------------------------------|-----------|----------|
| 69         | <b>Arsenic Trioxide</b>         | <b>20</b> | <b>2</b> |
| 70         | Crizotinib                      | 20        | 2        |
| 71         | Pazopanib                       | 19        | 2        |
| 72         | Venetoclax                      | 19        | 2        |
| 73         | Azacitidine                     | 18        | 2        |
| <b>74</b>  | <b><i>Bendamustine</i></b>      | <b>17</b> | <b>2</b> |
| 75         | Dabrafenib                      | 17        | 2        |
| <b>76</b>  | <b><i>Bicalutamide</i></b>      | <b>16</b> | <b>2</b> |
| 77         | Axitinib                        | 15        | 2        |
| 78         | Pegylated liposomal Doxorubicin | 15        | 2        |
| 79         | Ramucirumab                     | 15        | 2        |
| <b>80</b>  | <b><i>Tretinoin (ATRA)</i></b>  | <b>14</b> | <b>2</b> |
| 81         | Degarelix                       | 13        | 1        |
| 82         | Apalutamide                     | 12        | 1        |
| <b>83</b>  | <b><i>Dacarbazine</i></b>       | <b>12</b> | <b>1</b> |
| 84         | Cabazitaxel                     | 11        | 1        |
| 85         | Other                           | 11        | 1        |
| 86         | Brigatinib                      | 10        | 1        |
| 87         | Exemestane                      | 10        | 1        |
| 88         | Idarubicin                      | 9         | 1        |
| <b>89</b>  | <b><i>Melphalan</i></b>         | <b>9</b>  | <b>1</b> |
| 90         | Trametinib                      | 9         | 1        |
| 91         | Eribulin                        | 8         | 1        |
| 92         | Everolimus                      | 8         | 1        |
| 93         | Ponatinib                       | 8         | 1        |
| 94         | Regorafenib                     | 8         | 1        |
| 95         | Acalabrutinib                   | 7         | 1        |
| 96         | Blinatumomab                    | 7         | 1        |
| 97         | Octreotide                      | 7         | 1        |
| 98         | Pomalidomide                    | 7         | 1        |
| <b>99</b>  | <b><i>Vinblastine</i></b>       | <b>7</b>  | <b>1</b> |
| <b>100</b> | <b><i>Dactinomycin</i></b>      | <b>6</b>  | <b>1</b> |
| <b>101</b> | <b><i>Fludarabine</i></b>       | <b>6</b>  | <b>1</b> |
| <b>102</b> | <b><i>Mercaptopurine</i></b>    | <b>6</b>  | <b>1</b> |
| <b>103</b> | <b><i>Nilotinib</i></b>         | <b>6</b>  | <b>1</b> |
| 104        | Pamidronate                     | 6         | 1        |
| 105        | Vemurafinib                     | 6         | 1        |
| 106        | Avelumab                        | 5         | 1        |

|            |                          |          |          |
|------------|--------------------------|----------|----------|
| 107        | Cobimetinib              | 5        | 1        |
| 108        | Inotuzumab ozogamicin    | 5        | 1        |
| <b>109</b> | <b>Pegaspargase</b>      | <b>5</b> | <b>1</b> |
| <b>110</b> | <b>Thalidomide</b>       | <b>5</b> | <b>1</b> |
| 111        | Topotecan                | 5        | 1        |
| 112        | Triptorelin              | 5        | 1        |
| 113        | Alemtuzumab              | 4        | 0        |
| 114        | Carfilzomib              | 4        | 0        |
| 115        | Chlorambucil             | 4        | 0        |
| 116        | Decitabine               | 4        | 0        |
| 117        | Flutamide                | 4        | 0        |
| 118        | L-Asparaginase           | 4        | 0        |
| 119        | Lanreotide               | 4        | 0        |
| 120        | Medroxyprogesterone      | 4        | 0        |
| 121        | Midostaurin              | 4        | 0        |
| 122        | Obinutuzumab             | 4        | 0        |
| 123        | Radium-223               | 4        | 0        |
| 124        | Ruxolitinib              | 4        | 0        |
| 125        | Talazoparib              | 4        | 0        |
| 126        | Trifluridine / Tipiracil | 4        | 0        |
| 127        | Busulfan                 | 3        | 0        |
| 128        | Erwinia Asparaginase     | 3        | 0        |
| 129        | Lomustine                | 3        | 0        |
| 130        | Mitomycin                | 3        | 0        |
| 131        | Nilutamide               | 3        | 0        |
| 132        | Bosutinib                | 2        | 0        |
| 133        | Ceritinib                | 2        | 0        |
| 134        | Cladribine               | 2        | 0        |
| 135        | Interferon alfa-2b       | 2        | 0        |
| 136        | Lapatinib                | 2        | 0        |
| 137        | Megestrol Acetate        | 2        | 0        |
| 138        | Nelarabine               | 2        | 0        |
| <b>139</b> | <b>Vinorelbine</b>       | <b>2</b> | <b>0</b> |
| 140        | Vismodegib               | 2        | 0        |
| 141        | Anagrelide               | 1        | 0        |
| 142        | Buserelin                | 1        | 0        |
| 143        | Dinutuximab              | 1        | 0        |
| 144        | Idelalisib               | 1        | 0        |



|                                                                                                                                                                                                                                    |                      |          |          |
|------------------------------------------------------------------------------------------------------------------------------------------------------------------------------------------------------------------------------------|----------------------|----------|----------|
| 145                                                                                                                                                                                                                                | Ixazomib             | 1        | 0        |
| 146                                                                                                                                                                                                                                | Liposomal Irinotecan | 1        | 0        |
| 147                                                                                                                                                                                                                                | Mitotane             | 1        | 0        |
| 148                                                                                                                                                                                                                                | Procarbazine         | 1        | 0        |
| 149                                                                                                                                                                                                                                | Trabectedin          | 1        | 0        |
| 150                                                                                                                                                                                                                                | Veleparib            | 1        | 0        |
| 151                                                                                                                                                                                                                                | Aldesleukin          | 0        | 0        |
| 152                                                                                                                                                                                                                                | Amsacrine            | 0        | 0        |
| 153                                                                                                                                                                                                                                | Carmustine           | 0        | 0        |
| 154                                                                                                                                                                                                                                | Elotuzumab           | 0        | 0        |
| 155                                                                                                                                                                                                                                | Mitoxantrone         | 0        | 0        |
| 156                                                                                                                                                                                                                                | Pralatrexate         | 0        | 0        |
| 157                                                                                                                                                                                                                                | Raltitrexed          | 0        | 0        |
| 158                                                                                                                                                                                                                                | Romidepsin           | 0        | 0        |
| 159                                                                                                                                                                                                                                | Siltuximab           | 0        | 0        |
| 160                                                                                                                                                                                                                                | Strontium-89         | 0        | 0        |
| 161                                                                                                                                                                                                                                | Temsirolimus         | 0        | 0        |
| <b>162</b>                                                                                                                                                                                                                         | <b>Thioguanine</b>   | <b>0</b> | <b>0</b> |
| 163                                                                                                                                                                                                                                | Vandetanib           | 0        | 0        |
| 164                                                                                                                                                                                                                                | Vorinostat           | 0        | 0        |
| ^Not explicitly on EML, but therapeutic interchange with leuprorelin is permitted as these medications are of the same class. Therefore it was listed as included.<br><b>Bolded</b> entries are represented on the 21st EML (2019) |                      |          |          |
